# Supplementary material for: The Role of Honey Bee Derived Aliphatic Esters in the Host-Finding Behavior of Varroa destructor
Source: MDPI journal article supplement (doi:10.3390/insects14010024), 2022-12-25
Supplement: s1 [file s1]

**Table S1. Qualification and quantification of volatiles on the body surface of honeybee larvae by GC-MS.**

| Peak No. | Retention time (min) | Proposed identity                                       | Kovats Retention Index | Formula | Amount (ng/bee) |       |                  |        |                 |       |                  |       |
|----------|----------------------|---------------------------------------------------------|------------------------|---------|-----------------|-------|------------------|--------|-----------------|-------|------------------|-------|
|          |                      |                                                         |                        |         | Am drone (n=26) |       | Am worker (n=22) |        | Ac drone (n=23) |       | Ac worker (n=19) |       |
|          |                      |                                                         |                        |         | Mean            | SD    | Mean             | SD     | Mean            | SD    | Mean             | SD    |
| 1        | 3.827                | Toluene                                                 | 755                    | C7H8    | -               | -     | 0.357            | 0.620  | -               | -     | 1.539            | 2.706 |
| 2        | 4.525                | Octane                                                  | 800                    | C8H18   | 2.467           | 1.855 | 1.049            | 1.133  | -               | -     | -                | -     |
| 3        | 5.057                | Propanoic acid, 2,2-dimethyl-                           | 864                    | C8H9NO2 | -               | -     | -                | -      | 0.213           | 0.689 | -                | -     |
| 4        | 5.118                | Heptane, 2,4-dimethyl-                                  | 797                    | C9H20   | 0.657           | 0.858 | 1.419            | 0.949  | -               | -     | 0.552            | 0.673 |
| 5        | 6.475                | Octane, 4-methyl-                                       | 866                    | C9H20   | 0.228           | 0.323 | 0.469            | 0.331  | -               | -     | 0.081            | 0.245 |
| 6        | 6.549                | Unknown                                                 |                        |         | -               | -     | -                | -      | -               | -     | 1.403            | 3.362 |
| 7        | 7.967                | Nonane                                                  | 900                    | C9H20   | 0.175           | 0.619 | -                | -      | -               | -     | -                | -     |
| 8        | 8.724                | Unknown                                                 |                        |         | 3.053           | 3.738 | 2.722            | 3.031  | 1.291           | 2.674 | 5.035            | 2.760 |
| 9        | 10.156               | 2(3H)-Furanone, dihydro-5-methyl-                       | 921                    | C5H8O2  | -               | -     | 0.078            | 0.367  | -               | -     | -                | -     |
| 10       | 11.018               | Unknown                                                 |                        |         | 0.431           | 0.759 | -                | -      | -               | -     | 0.514            | 1.053 |
| 11       | 11.121               | Unknown                                                 |                        |         | 0.838           | 1.319 | -                | -      | -               | -     | -                | -     |
| 12       | 12.584               | Unknown                                                 |                        |         | 0.540           | 0.646 | -                | -      | -               | -     | -                | -     |
| 13       | 12.788               | Bicyclo[3.1.1]heptane, 6,6-dimethyl-2-methylene-, (1S)- | 972                    | C10H16  | -               | -     | 0.147            | 0.689  | -               | -     | -                | -     |
| 14       | 13.169               | Hexanoic acid                                           | 983                    | C6H12O2 | -               | -     | 0.339            | 1.176  | 0.870           | 1.255 | -                | -     |
| 15       | 13.401               | Unknown                                                 |                        |         | -               | -     | 0.502            | 0.869  | -               | -     | -                | -     |
| 16       | 14.302               | Unknown                                                 |                        |         | -               | -     | 3.565            | 2.989  | -               | -     | -                | -     |
| 17       | 14.767               | D-Limonene                                              | 1024                   | C10H16  | -               | -     | 2.120            | 1.155  | -               | -     | 1.207            | 1.081 |
| 18       | 15.055               | 1-Hexanol, 2-ethyl-                                     | 1012                   | C8H18O  | -               | -     | 3.098            | 1.197  | -               | -     | 2.322            | 1.957 |
| 19       | 15.548               | trans- $\beta$ -Ocimene                                 | 1029                   | C10H16  | -               | -     | 0.215            | 0.632  | -               | -     | -                | -     |
| 20       | 15.743               | Unknown                                                 |                        |         | 0.279           | 0.362 | -                | -      | -               | -     | -                | -     |
| 21       | 16.060               | $\beta$ -Ocimene                                        | 1038                   | C10H16  | -               | -     | 14.914           | 23.274 | -               | -     | -                | -     |
| 22       | 16.673               | Dodecane                                                | 1200                   | C12H26  | 0.898           | 1.338 | 1.779            | 1.803  | -               | -     | 1.493            | 1.314 |
| 23       | 16.943               | 2,6-Dimethyldecane                                      | 1119                   | C12H26  | 0.270           | 0.388 | 0.359            | 0.488  | -               | -     | -                | -     |
| 24       | 17.123               | Unknown                                                 |                        |         | 0.440           | 1.347 | 0.283            | 0.877  | -               | -     | -                | -     |

|    |        |                                              |      |          |       |       |        |        |       |       |       |       |
|----|--------|----------------------------------------------|------|----------|-------|-------|--------|--------|-------|-------|-------|-------|
| 25 | 17.179 | Unknown                                      |      |          | 0.754 | 0.829 | 0.090  | 0.250  | -     | -     | -     | -     |
| 26 | 17.807 | Unknown                                      |      |          | -     | -     | 0.301  | 0.657  | -     | -     | -     | -     |
| 27 | 17.973 | trans-Linalool oxide (furanoid)              | 1060 | C10H18O2 | 1.167 | 2.287 | 0.265  | 1.106  | -     | -     | -     | -     |
| 28 | 18.206 | Benzoic acid, methyl ester                   | 1062 | C8H8O2   | 6.220 | 4.316 | 0.565  | 1.304  | -     | -     | -     | -     |
| 29 | 18.644 | Linalool                                     | 1080 | C10H18O  | 0.289 | 0.714 | 16.666 | 14.317 | -     | -     | -     | -     |
| 30 | 18.870 | Nonanal                                      | 1073 | C9H18O   | -     | -     | -      | -      | 2.325 | 3.887 | -     | -     |
| 31 | 19.206 | Benzene, 1,2,4,5-tetramethyl-                | 1101 | C10H14   | 0.300 | 0.431 | 0.040  | 0.189  | 1.368 | 1.554 | -     | -     |
| 32 | 19.695 | 1,3,8-p-Menthatriene                         | 1119 | C10H14   | -     | -     | 0.121  | 0.394  | -     | -     | -     | -     |
| 33 | 20.104 | 2,6-Dimethyl-1,3,5,7-octatetraene, E,E-      | 1130 | C10H14   | -     | -     | 1.346  | 2.714  | -     | -     | -     | -     |
| 34 | 20.699 | 2,4,6-Octatriene, 2,6-dimethyl-, (E,Z)-      | 1131 | C10H16   | -     | -     | 1.121  | 2.161  | -     | -     | -     | -     |
| 35 | 23.239 | L- $\alpha$ -Terpineol / $\alpha$ -Terpineol | 1198 | C10H18O  | -     | -     | 1.776  | 1.846  | -     | -     | -     | -     |
| 36 | 23.380 | Methyl salicylate                            | 1176 | C8H8O3   | -     | -     | -      | -      | 5.161 | 4.468 | 0.144 | 0.437 |
| 37 | 23.427 | Octanoic acid                                | 1158 | C8H16O2  | 0.940 | 1.934 | -      | -      | -     | -     | -     | -     |
| 38 | 24.109 | 1,4:3,6-Dianhydro-.alpha.-d-glucopyranose    | 1199 | C6H8O4   | -     | -     | -      | -      | 0.335 | 0.821 | -     | -     |
| 39 | 25.052 | Unknown                                      |      |          | 0.055 | 0.280 | -      | -      | -     | -     | -     | -     |
| 40 | 26.686 | Unknown                                      |      |          | -     | -     | -      | -      | -     | -     | 0.362 | 0.890 |
| 41 | 29.227 | Nonanoic acid                                | 1263 | C9H18O2  | 0.110 | 0.428 | -      | -      | -     | -     | -     | -     |
| 42 | 30.125 | Unknown                                      |      |          | -     | -     | 0.591  | 2.773  | -     | -     | -     | -     |
| 43 | 30.674 | Tridecane                                    | 1300 | C13H28   | 2.846 | 1.860 | 0.064  | 0.298  | -     | -     | -     | -     |
| 44 | 32.477 | Methyl anthranilate                          | 1320 | C8H9NO2  | 0.480 | 2.101 | -      | -      | -     | -     | -     | -     |
| 45 | 32.645 | Unknown                                      |      |          | 0.474 | 1.727 | -      | -      | 0.146 | 0.700 | -     | -     |
| 46 | 34.559 | 2-Decenoic acid, methyl ester                | 1362 | C11H20O2 | -     | -     | -      | -      | 1.457 | 2.423 | -     | -     |
| 47 | 36.726 | 2,4,7,9-Tetramethyl-5-decyne-4,7-diol        | 1407 | C14H26O2 | -     | -     | -      | -      | 0.352 | 0.679 | -     | -     |
| 48 | 37.903 | Ethyl trans-2-decenoate                      | 1166 | C12H22O2 | -     | -     | -      | -      | 4.848 | 5.931 | 0.663 | 1.221 |
| 49 | 40.023 | Pentadecane                                  | 1500 | C15H32   | 6.090 | 4.164 | 1.927  | 1.223  | -     | -     | -     | -     |
| 50 | 40.305 | 2,4-Di-tert-butylphenol                      | 1519 | C14H22O  | -     | -     | -      | -      | 7.130 | 5.797 | -     | -     |
| 51 | 46.233 | 2-Pentadecanone                              | 1682 | C15H30O  | -     | -     | -      | -      | 0.479 | 0.653 | -     | -     |
| 52 | 46.345 | Heptadecane                                  | 1700 | C17H36   | 3.961 | 2.716 | 1.044  | 0.949  | -     | -     | -     | -     |
| 53 | 48.904 | Tetradecanoic acid, ethyl ester (Ethyl       | 1778 | C16H32O2 | 10.38 | 11.45 | 2.491  | 1.248  | 4.543 | 5.950 | 2.119 | 0.818 |

|    |        |                                                       |      |          |       |       |       |       |       |       |       |       |
|----|--------|-------------------------------------------------------|------|----------|-------|-------|-------|-------|-------|-------|-------|-------|
|    |        | myristate)                                            |      |          | 9     | 8     |       |       |       |       |       |       |
| 54 | 51.641 | Nonadecane                                            | 1900 | C19H40   | 1.204 | 1.035 | 0.033 | 0.155 | -     | -     | -     | -     |
| 55 | 52.248 | Hexadecanoic acid, methyl ester<br>(Methyl palmitate) | 1908 | C17H34O2 | 1.877 | 3.965 | 0.408 | 1.245 | 1.865 | 3.691 | 2.130 | 0.909 |
| 56 | 53.179 | n-Hexadecanoic acid                                   | 1941 | C16H32O2 | 0.186 | 0.414 | -     | -     | 0.409 | 0.974 | -     | -     |
| 57 | 53.235 | Ethyl 9-hexadecenoate                                 | 1955 | C18H34O2 | 0.157 | 0.338 | -     | -     | -     | -     | -     | -     |
| 58 | 53.901 | Hexadecanoic acid, ethyl ester<br>(Ethyl palmitate)   | 1976 | C18H36O2 | 13.87 | 16.64 | 1.530 | 0.917 | 9.736 | 9.346 | 5.695 | 2.259 |
|    |        |                                                       |      |          | 4     |       |       |       |       |       |       |       |
| 59 | 56.301 | 9-Octadecanoic acid , methyl ester,(E)-               | 2098 | C19H38O2 | 0.403 | 0.937 | -     | -     | 0.198 | 0.407 | 0.079 | 0.237 |
| 60 | 56.314 | Heneicosane                                           | 2100 | C21H44   | 0.075 | 0.185 | -     | -     | -     | -     | -     | -     |
| 61 | 57.671 | Ethyl Oleate                                          | 2171 | C20H38O2 | 3.155 | 6.171 | 0.368 | 0.500 | 1.751 | 1.953 | 1.203 | 0.755 |
| 62 | 58.221 | Octadecanoic acid, ethyl ester                        | 2175 | C20H40O2 | 0.290 | 0.793 | -     | -     | 0.034 | 0.095 | -     | -     |
| 63 | 60.042 | Tricosane                                             | 2300 | C23H48   | 0.176 | 0.371 | -     | -     | -     | -     | -     | -     |

*Am: Apis mellifera; Ac: Apis cerana; “-”: not detected. Compounds that cannot be properly identified are marked as “unknown”.*
